# Supplementary material for: Phase II Trial of Nivolumab in Metastatic Rare Cancer with dMMR or MSI-H and Relation with Immune Phenotypic Analysis (the ROCK Trial)
Source: PubMed Central journal article supplement — Clin Cancer Res. 2023 Oct 11;29(24):5079–86. doi: 10.1158/1078-0432.CCR-23-1807 (PMC10722134; doi:10.1158/1078-0432.ccr-23-1807), 2023-10-11
Supplement: ccr-23-1807_supplementary_figure_s1_suppfs1.pdf [file ccr-23-1807_supplementary_figure_s1_suppfs1.pdf]

# Supplementary Figure S1

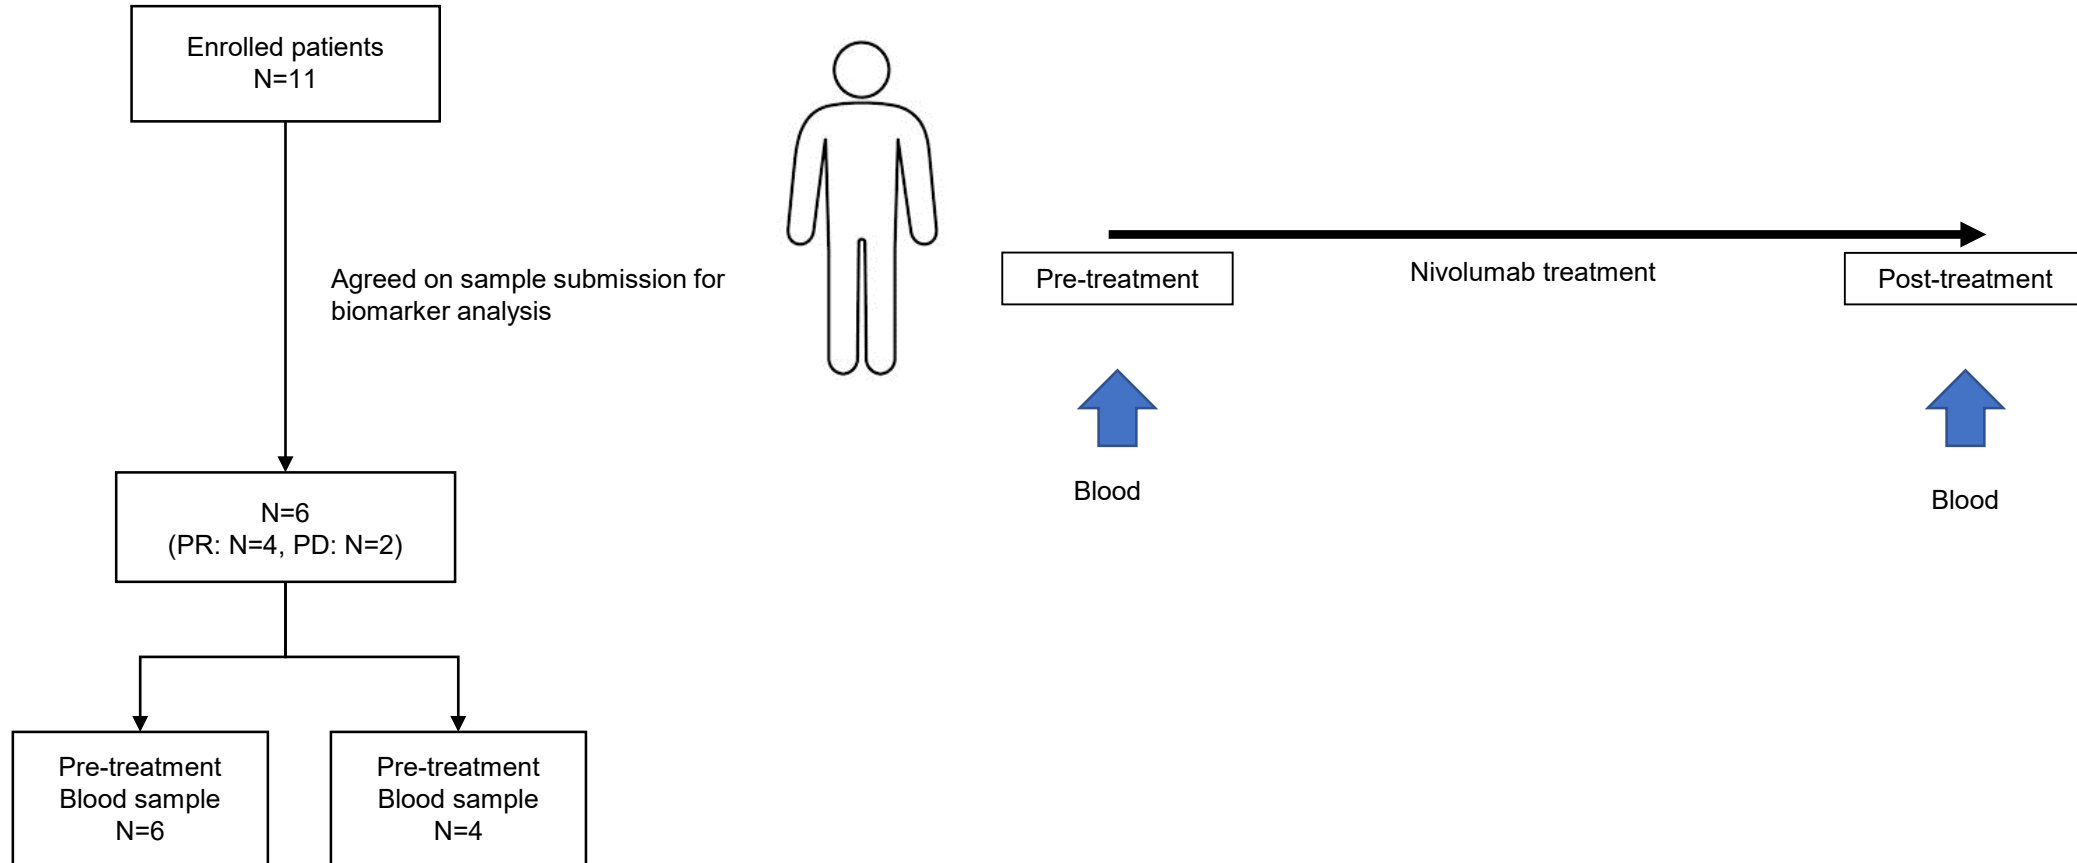

**Supplementary Figure S1: Translation Research biomarker analysis procedure.** Among the 11 patients enrolled in the trial, six patients agreed on sample submission for immune phenotyping using flowcytometry and CyTOF analysis. Pre-treatment and post-treatment blood samples were collected from six and four patients, respectively. PR, partial response; PD, progressive disease
