# Supplementary material for: Phase II Trial of Nivolumab in Metastatic Rare Cancer with dMMR or MSI-H and Relation with Immune Phenotypic Analysis (the ROCK Trial)
Source: PubMed Central journal article supplement — Clin Cancer Res. 2023 Oct 11;29(24):5079–86. doi: 10.1158/1078-0432.CCR-23-1807 (PMC10722134; doi:10.1158/1078-0432.ccr-23-1807), 2023-10-11
Supplement: ccr-23-1807_supplementary_figure_s2_suppfs2.pdf [file ccr-23-1807_supplementary_figure_s2_suppfs2.pdf]

Supplementary Figure S2

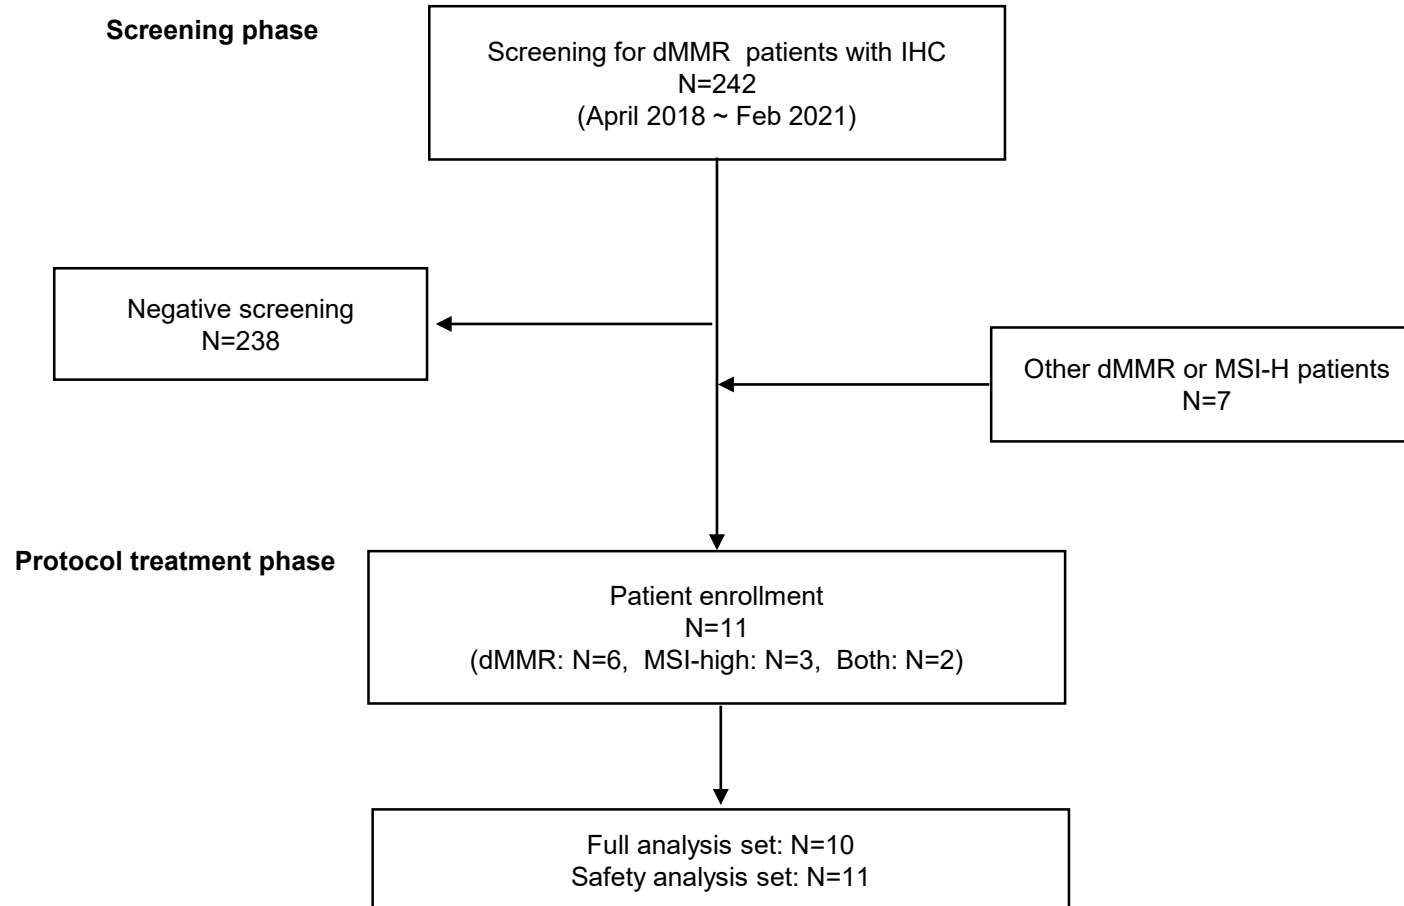

**Supplementary Figure S2: Disposition of Patients in the Study.** 242 patients were screened for dMMR through this trial. 4 patients were positive for dMMR and enrolled into the treatment protocol. Another 7 patients were identified as dMMR or MSI-H through different platforms. A total of 11 patients received protocol treatment who were included in the safety analysis. One patient did not meet all inclusion criteria. Therefore, 10 were included in the full analysis set. dMMR, mismatch repair deficiency; MSI, microsatellite instability
