# Supplementary material for: Phase II Trial of Nivolumab in Metastatic Rare Cancer with dMMR or MSI-H and Relation with Immune Phenotypic Analysis (the ROCK Trial)
Source: PubMed Central journal article supplement — Clin Cancer Res. 2023 Oct 11;29(24):5079–86. doi: 10.1158/1078-0432.CCR-23-1807 (PMC10722134; doi:10.1158/1078-0432.ccr-23-1807), 2023-10-11
Supplement: ccr-23-1807_supplementary_figure_s3_suppfs3.pdf [file ccr-23-1807_supplementary_figure_s3_suppfs3.pdf]

## Supplementary Figure S3

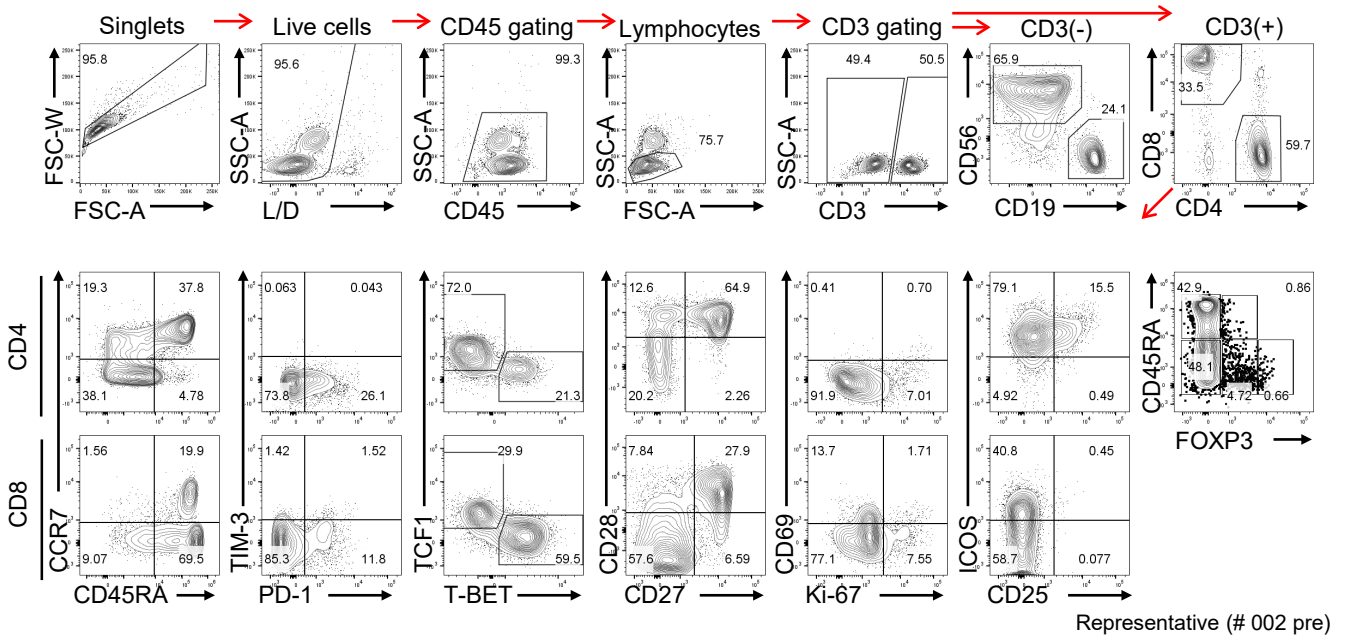

**Supplementary Figure S3: Gating strategy for immune phenotyping analysis.** This gating is related with the immune analysis at the baseline (Figure 3C and 3D) and pre- and post-nivolumab treatment (Supplementary Figure 6). tSNE plots shown in the Figure 3 and Supplementary Figure 4 were generated from the CD3<sup>+</sup> lymphocytes with this gating strategy.
