# Supplementary material for: Phase II Trial of Nivolumab in Metastatic Rare Cancer with dMMR or MSI-H and Relation with Immune Phenotypic Analysis (the ROCK Trial)
Source: PubMed Central journal article supplement — Clin Cancer Res. 2023 Oct 11;29(24):5079–86. doi: 10.1158/1078-0432.CCR-23-1807 (PMC10722134; doi:10.1158/1078-0432.ccr-23-1807), 2023-10-11
Supplement: ccr-23-1807_supplementary_figure_s4_suppfs4.pdf [file ccr-23-1807_supplementary_figure_s4_suppfs4.pdf]

# Supplementary Figure S4

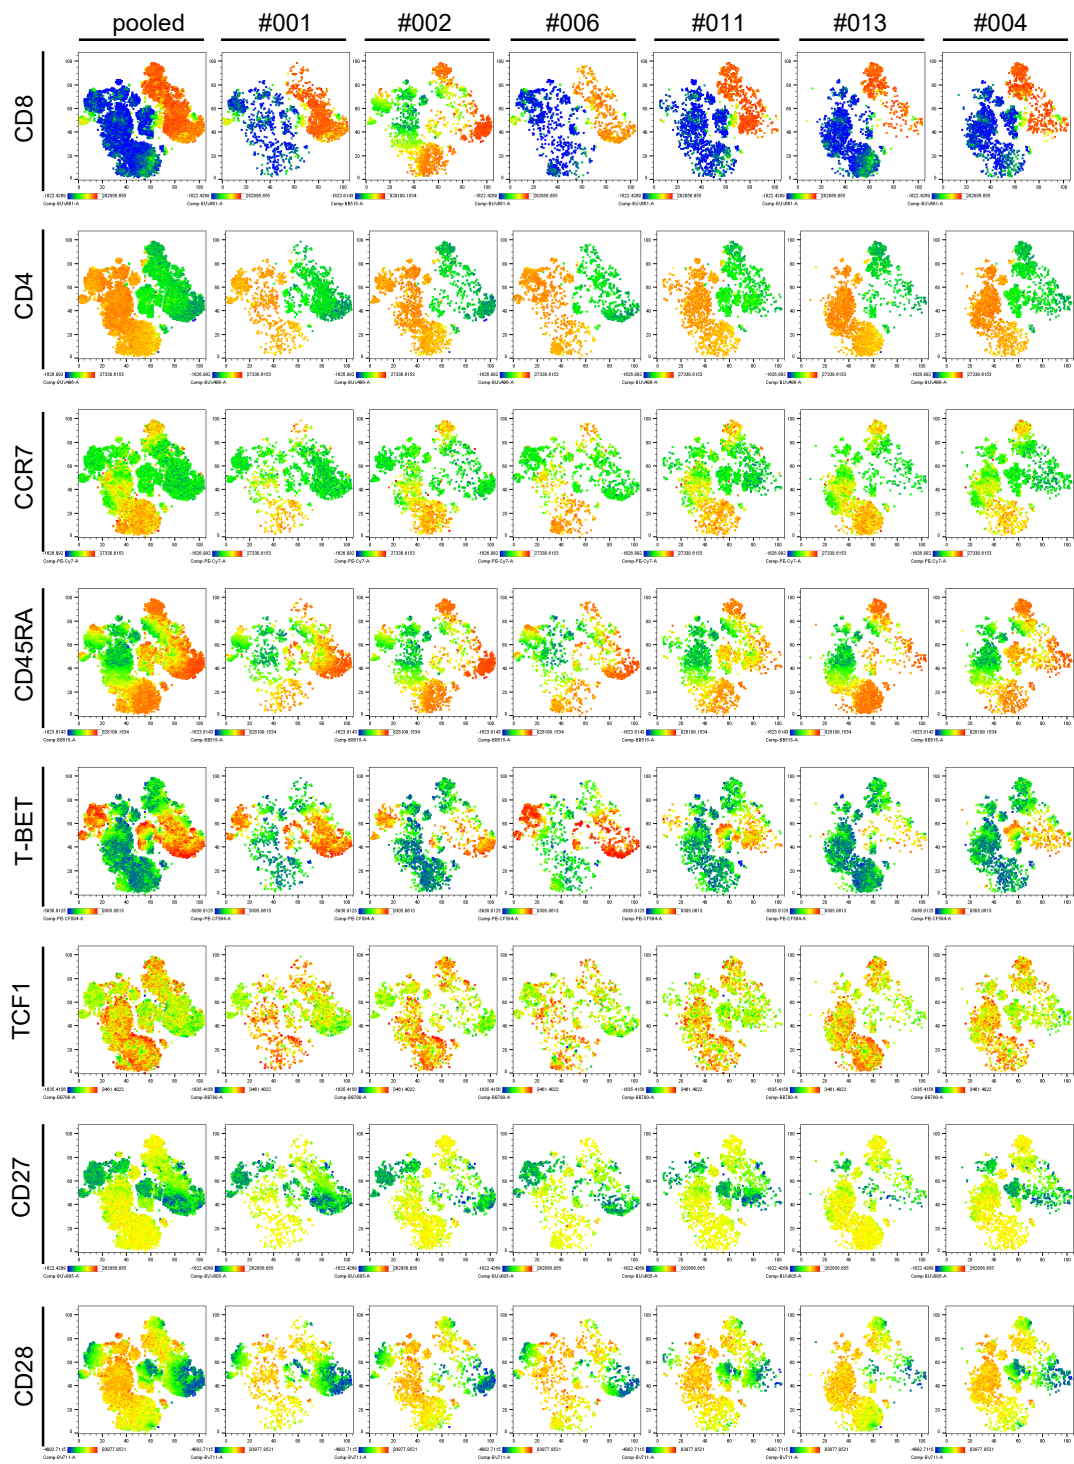

(continued on the next page)

# Supplementary Figure S4 (continued)

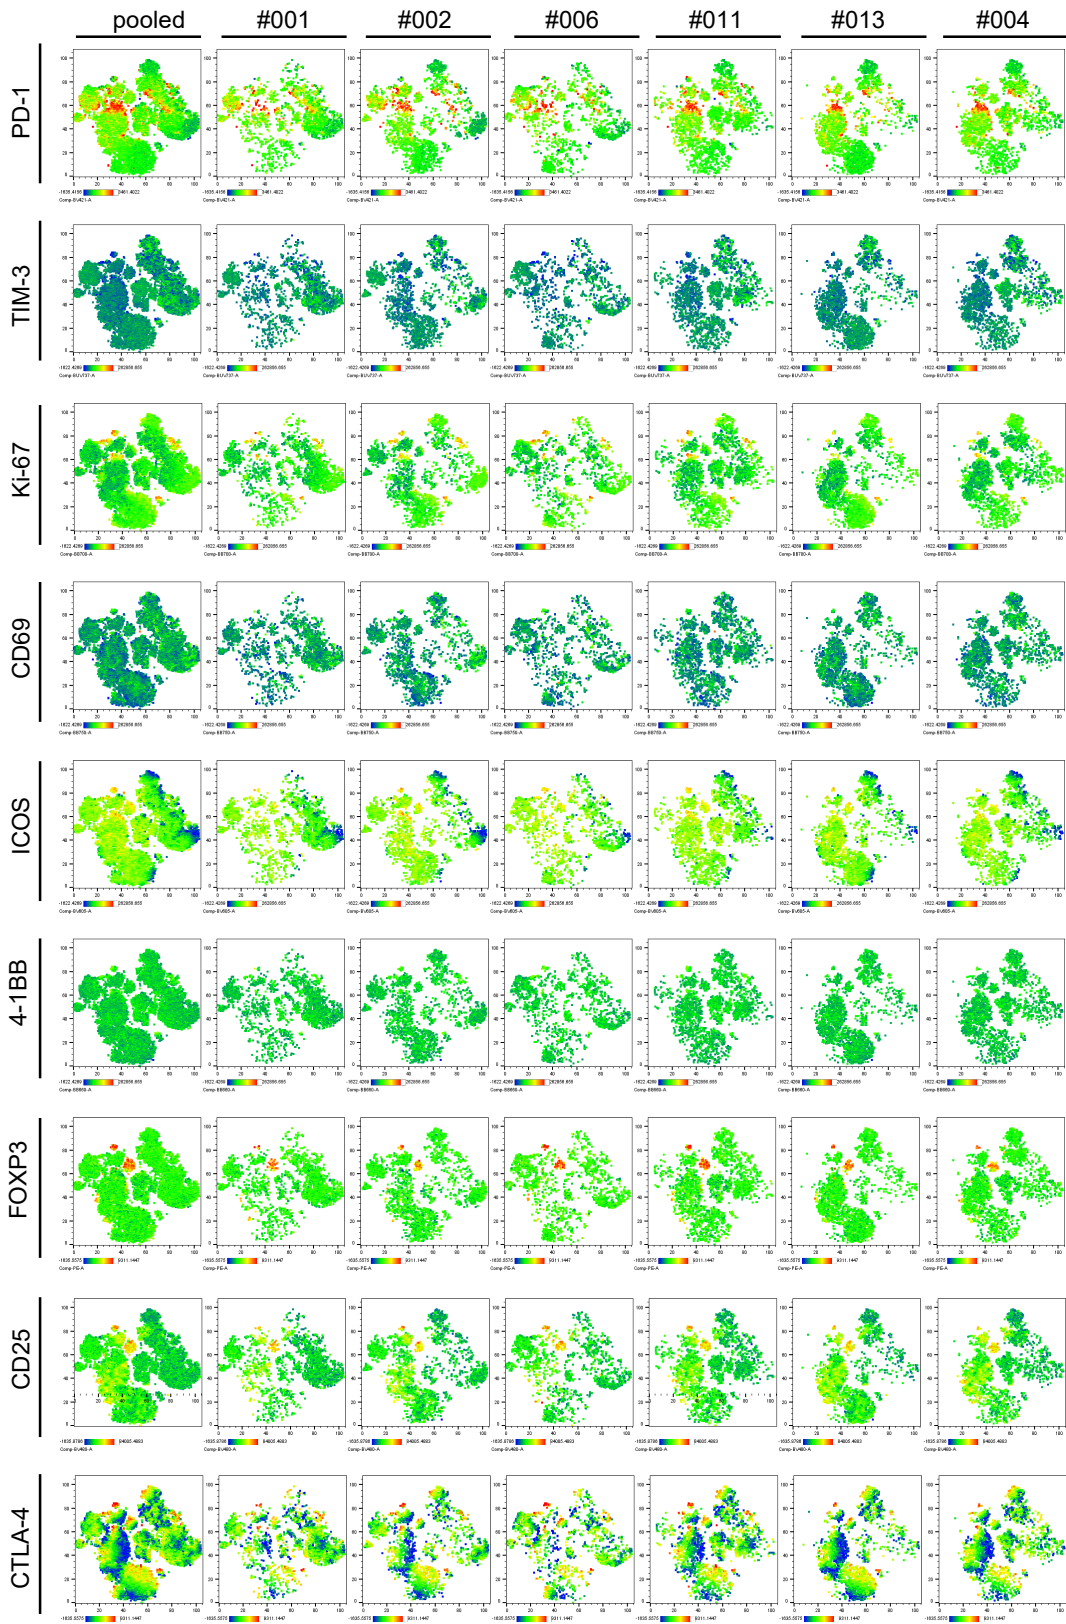

**Supplementary Figure S4: Heat map representation of each parameter in the tSNE plots. PBMCs from six patients at the baseline were analyzed with multicolor FCM. Live CD3<sup>+</sup> lymphocytes were subjected to the tSNE analysis using the 17 downstream parameters.**
