# Supplementary material for: Phase II Trial of Nivolumab in Metastatic Rare Cancer with dMMR or MSI-H and Relation with Immune Phenotypic Analysis (the ROCK Trial)
Source: PubMed Central journal article supplement — Clin Cancer Res. 2023 Oct 11;29(24):5079–86. doi: 10.1158/1078-0432.CCR-23-1807 (PMC10722134; doi:10.1158/1078-0432.ccr-23-1807), 2023-10-11
Supplement: ccr-23-1807_supplementary_figure_s5_suppfs5.pdf [file ccr-23-1807_supplementary_figure_s5_suppfs5.pdf]

A.

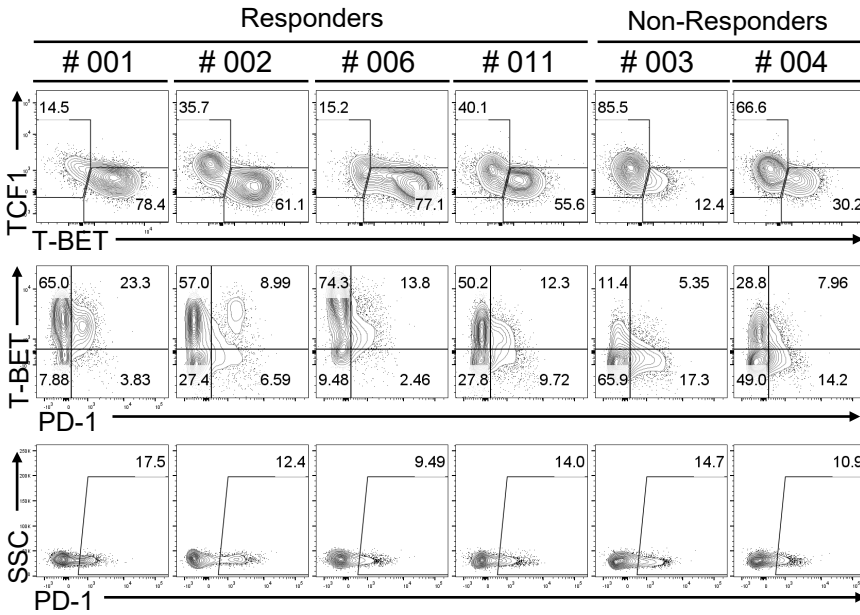

B.

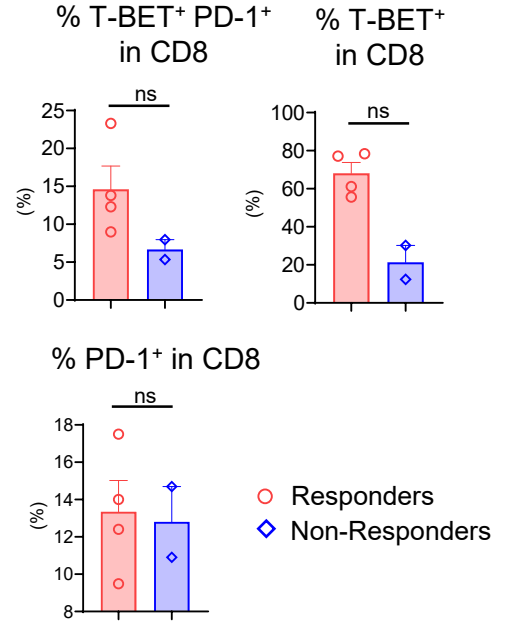

**Supplementary Figure S5: T-BET and PD-1 expression on the CD8+ T cells at the base line (related with the main figure 3).** PBMCs from six patients (four responders and two non-responders) were subjected to the FCM analysis. There were the similar trends to the CD4+ T cell population with enriched T-BET+ or T-BET+ PD-1+ cells (**A** and **B**) but there was no statistical significance (**B**). *ns*, not significant
