# Supplementary material for: Phase II Trial of Nivolumab in Metastatic Rare Cancer with dMMR or MSI-H and Relation with Immune Phenotypic Analysis (the ROCK Trial)
Source: PubMed Central journal article supplement — Clin Cancer Res. 2023 Oct 11;29(24):5079–86. doi: 10.1158/1078-0432.CCR-23-1807 (PMC10722134; doi:10.1158/1078-0432.ccr-23-1807), 2023-10-11
Supplement: ccr-23-1807_supplementary_figure_s6_suppfs6.pdf [file ccr-23-1807_supplementary_figure_s6_suppfs6.pdf]

Supplementary Figure S6

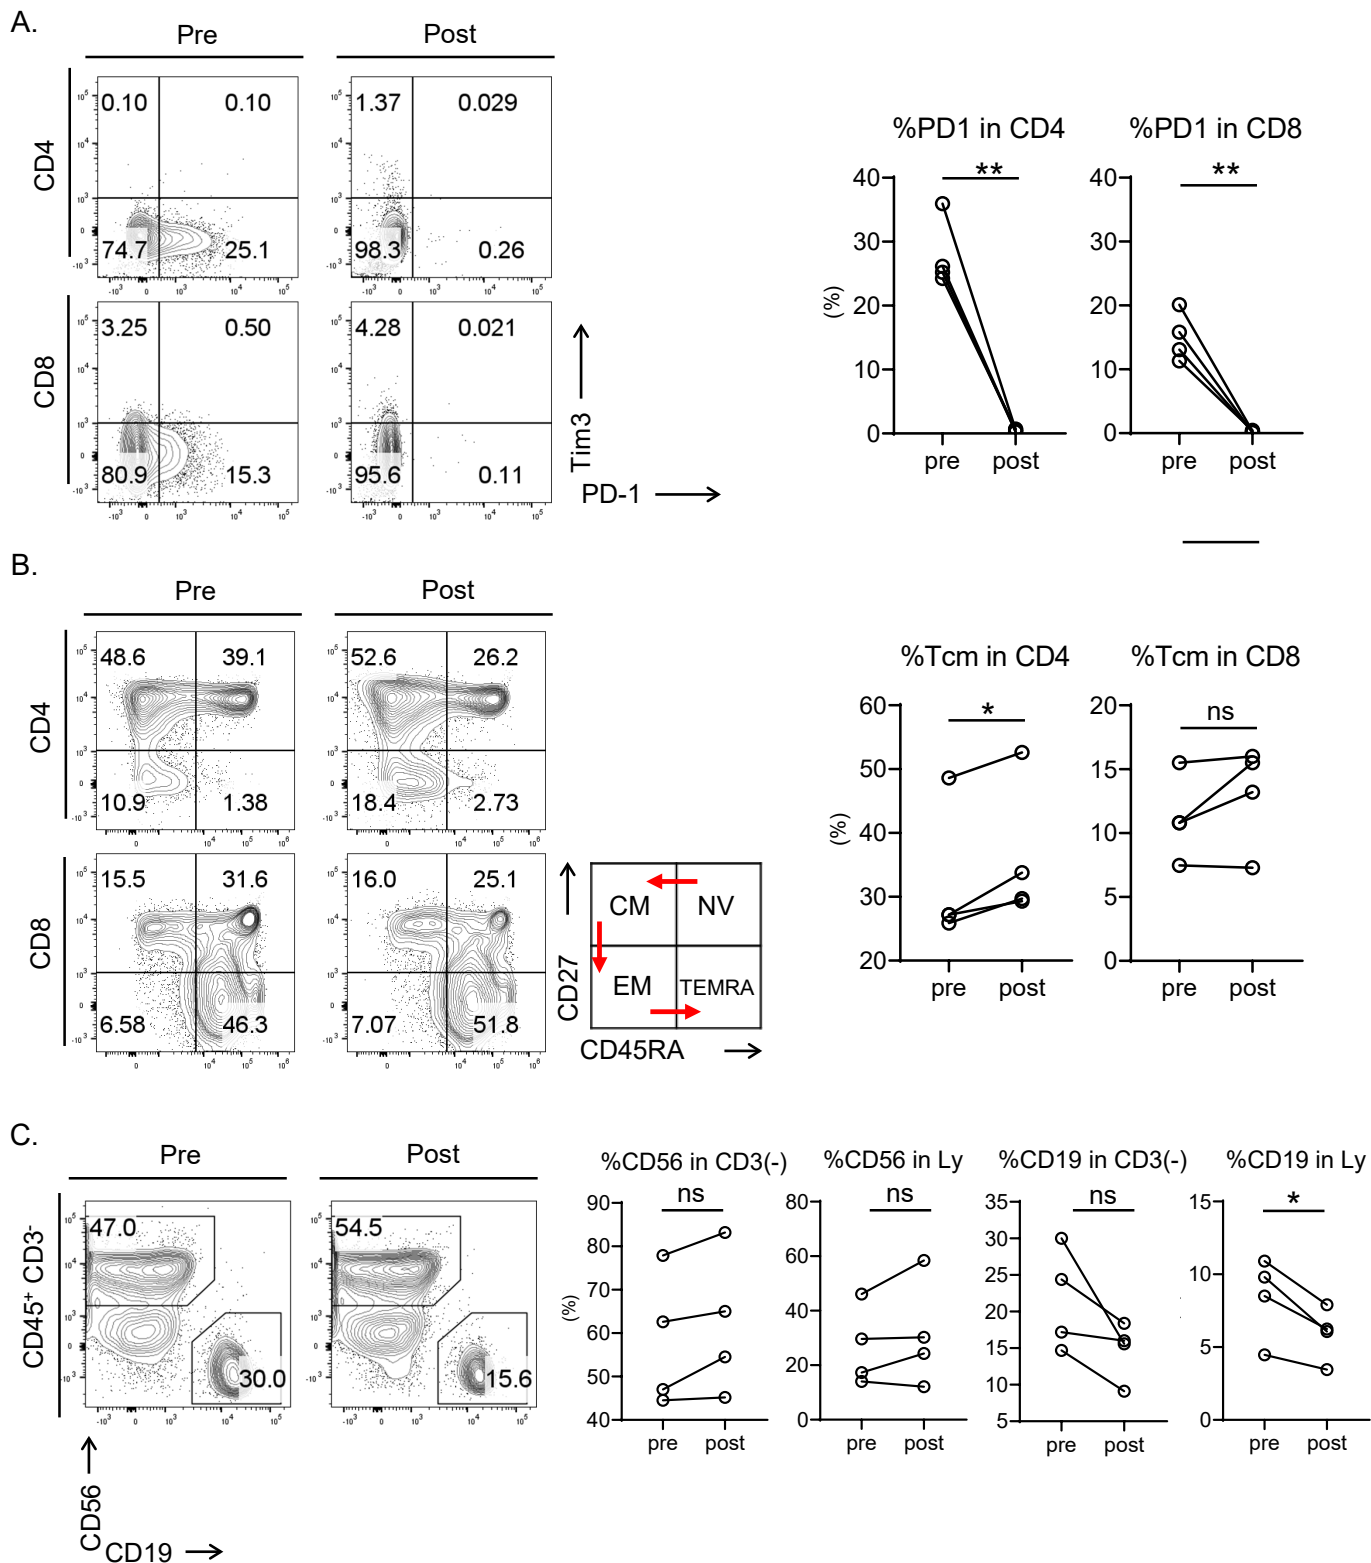

**Supplementary Figure S6: Immune responses after nivolumab treatment.** Four available sets of PBMCs pre- and post-nivolumab treatment were subjected to the FCM analysis. PD1 were not detectable after nivolumab treatment suggesting successful blockade of the PD-1 molecule (A). Nivolumab treatment drove CD4<sup>+</sup> T cell differentiation (B). There were trends of decreased CD56<sup>+</sup> NK cells and CD19<sup>+</sup> B cells after nivolumab treatment (C). Left panels show representative flow plots and right panels show pooled data from eight time points from four patients. Ly, lymphocytes; \*\*, p<0.01; \*, p<0.05; ns, not significant
